# Supplementary material
Source: PubMed Central journal article supplement (PMC423215)

**Fig. 6**

**A**

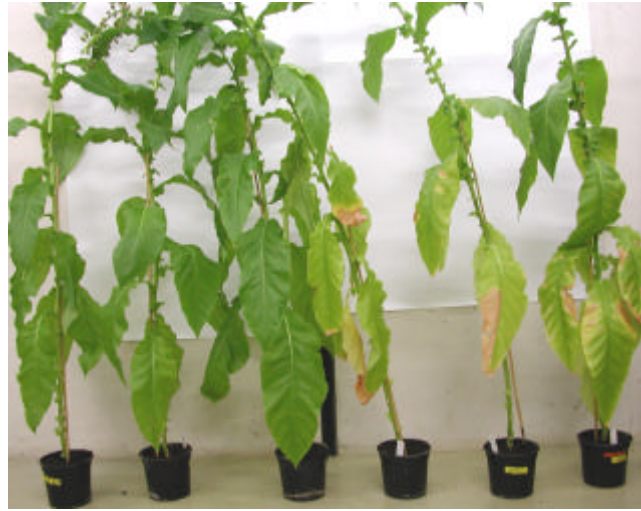

**NT58-15**

**W38**

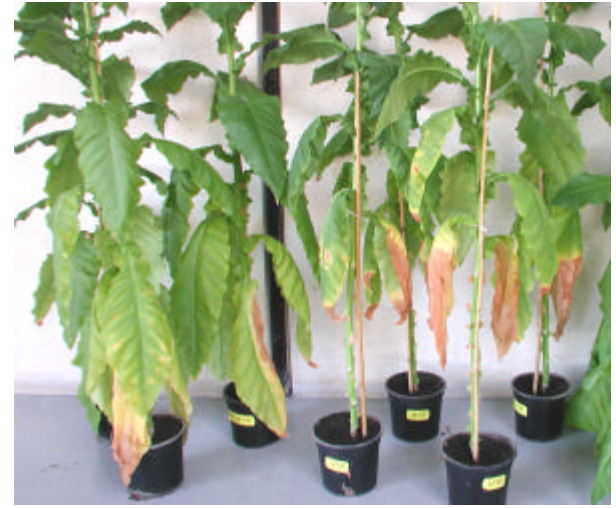

**NT58-69**

**W38**

**B**

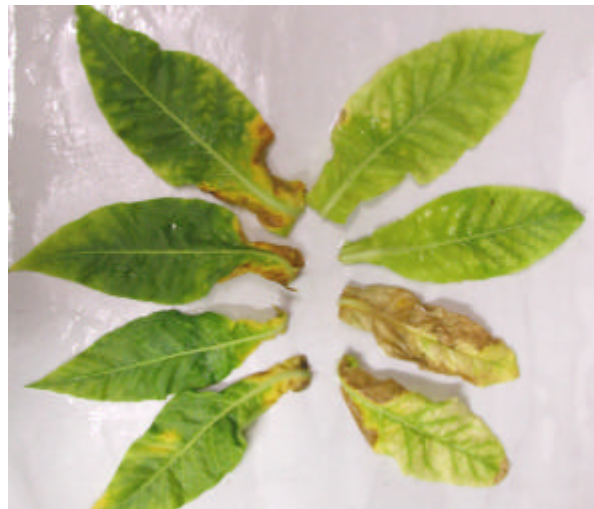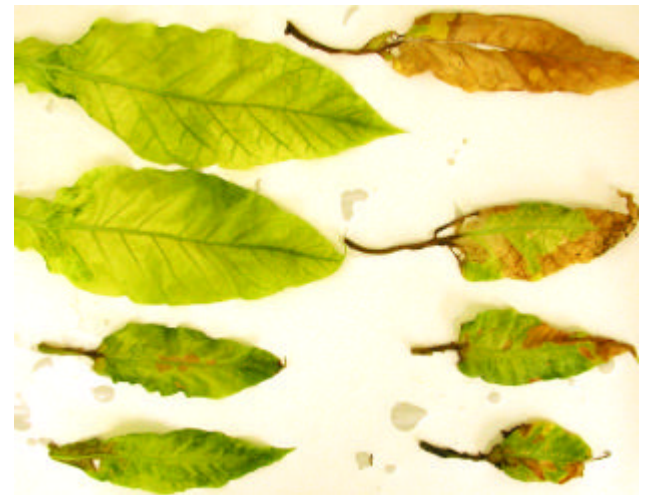

Supplement: plntcell_16_5_1276__1.pdf [file plntcell_16_5_1276__1.pdf]

**Fig. 7**

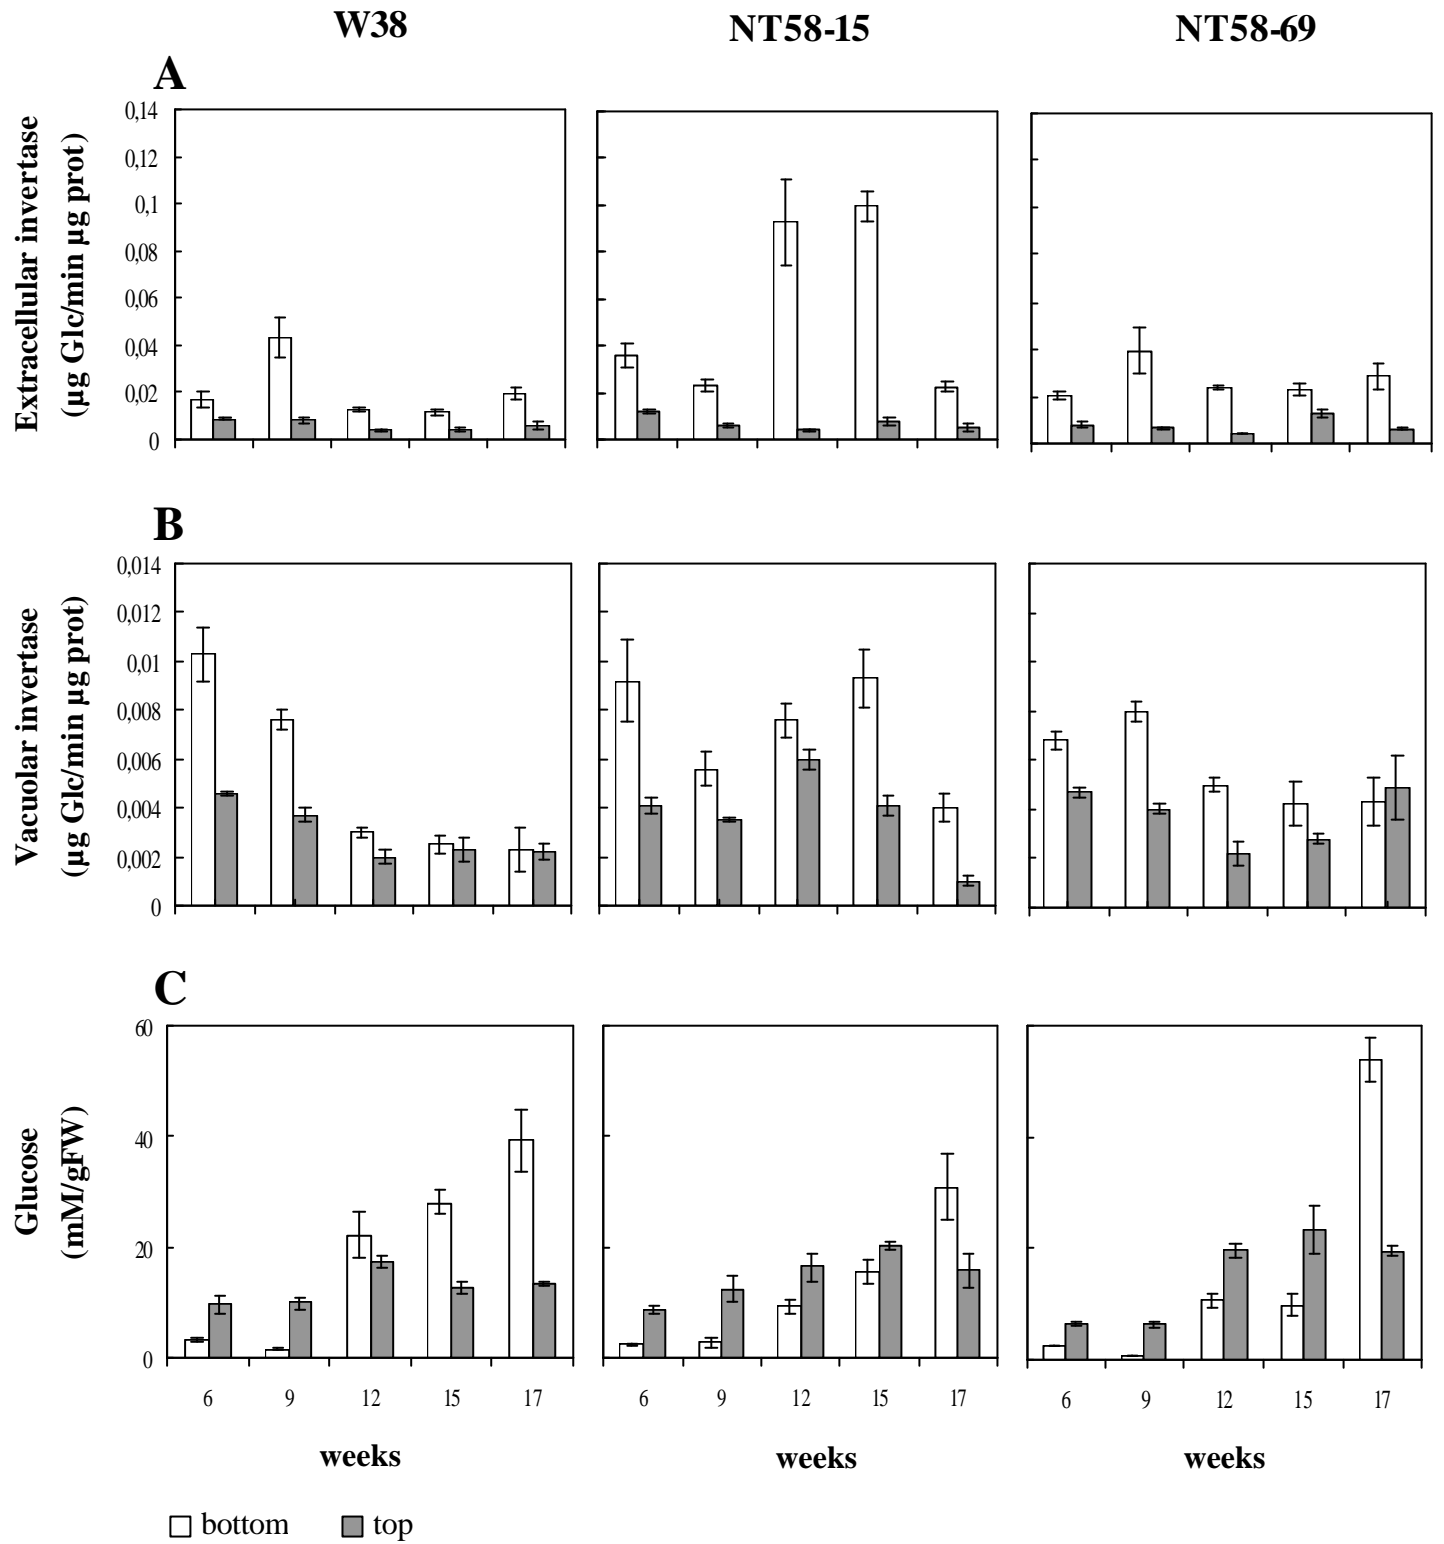

Supplement: plntcell_16_5_1276__2.pdf [file plntcell_16_5_1276__2.pdf]
